# Supplementary material
Source: publisher figshare collection journal article supplement (https://gsajournals.figshare.com/ndownloader/files/21385113)
Supplement: Supplementary file 1 [file 21385113]

## Sheet: ScSir2
ORF	gene	MACS2 score	log2FC (mt/wt)	KlSir2 regulated	Ellahi	location	description
YAR035W	YAT1	4.05023	1.85612	N	N	not near telomere	Outer mitochondrial carnitine acetyltransferase; also associated with ScHst1p
YCL068C	YCL068C	4.00592	1.6188	N	Y	HML	Putative protein of unknown function
YCL069W	VBA3	4.00592	9.42598	2016	Y	near HML	Permease of basic amino acids in the vacuolar membrane
YCL073C	GEX1	4.00592	8.40249	N	Y	near HML	Proton:glutathione antiporter localized to vacuolar and plasma membranes
YFL062W	COS4	4.57934	1.91194	N	Y	near telomere	Endosomal protein involved in turnover of plasma membrane proteins
YFL067W	YFL067W	4.40773	1.20252	N	N	near telomere	Protein of unknown function; localized to vacuole
YFR057W	YFR057W	3.01604	8.61112	N	Y	near telomere	Putative protein of unknown function
YHR216W	IMD2	5.02928	1.75326	N	Y	near telomere	Inosine monophosphate dehydrogenase; catalyzes the rate-limiting step in GTP biosynthesis
YLR460C	YLR460C	1.94903	1.37144	12&16	N	near telomere	Member of the quinone oxidoreductase family; also associated with ScHst1p
YOL165C	AAD15	17.1823	1.85493	N	Y	near telomere	Putative aryl-alcohol dehydrogenase
